# Supplementary material
Source: Springer Nature journal article supplement (https://www.springermedizin.de/resource/supplementary/12876_2009_340_MOESM5_ESM.pdf/9439204)
Supplement: MOESM5 [file 9439204]

515 patients were referred for PEG

**EXCLUDED**  
44 patients

**INCLUDED**  
471 patients

**SUCCESS (92.4%)**  
435 PEGs technique with curved needle

**FAILURE (7.6%)**  
36 PEGs technique with two straight needles
